# Supplementary material
Source: Royal Society of Chemistry journal article supplement (https://www.rsc.org/suppdata/p2/1999/2783/904473f.doc)
Supplement: Supplementary file 1 [file 904473f.doc]

**Supplementary data**

Use of chiral lanthanide shift reagents in the elucidation of NMR signals from enantiomeric mixtures of polycyclic compounds

**Mariane Axt, João Alifantes, Valentim Emílio Uberti Costa***

*Instituto de Química da Universidade Federal do Rio Grande do Sul. Av. Bento Gonçalves, 9500-91.501-970-Porto Alegre-RS-Brasil; Fax: 055 051 3191499. E-mail: valentim@if.ufrgs.br*


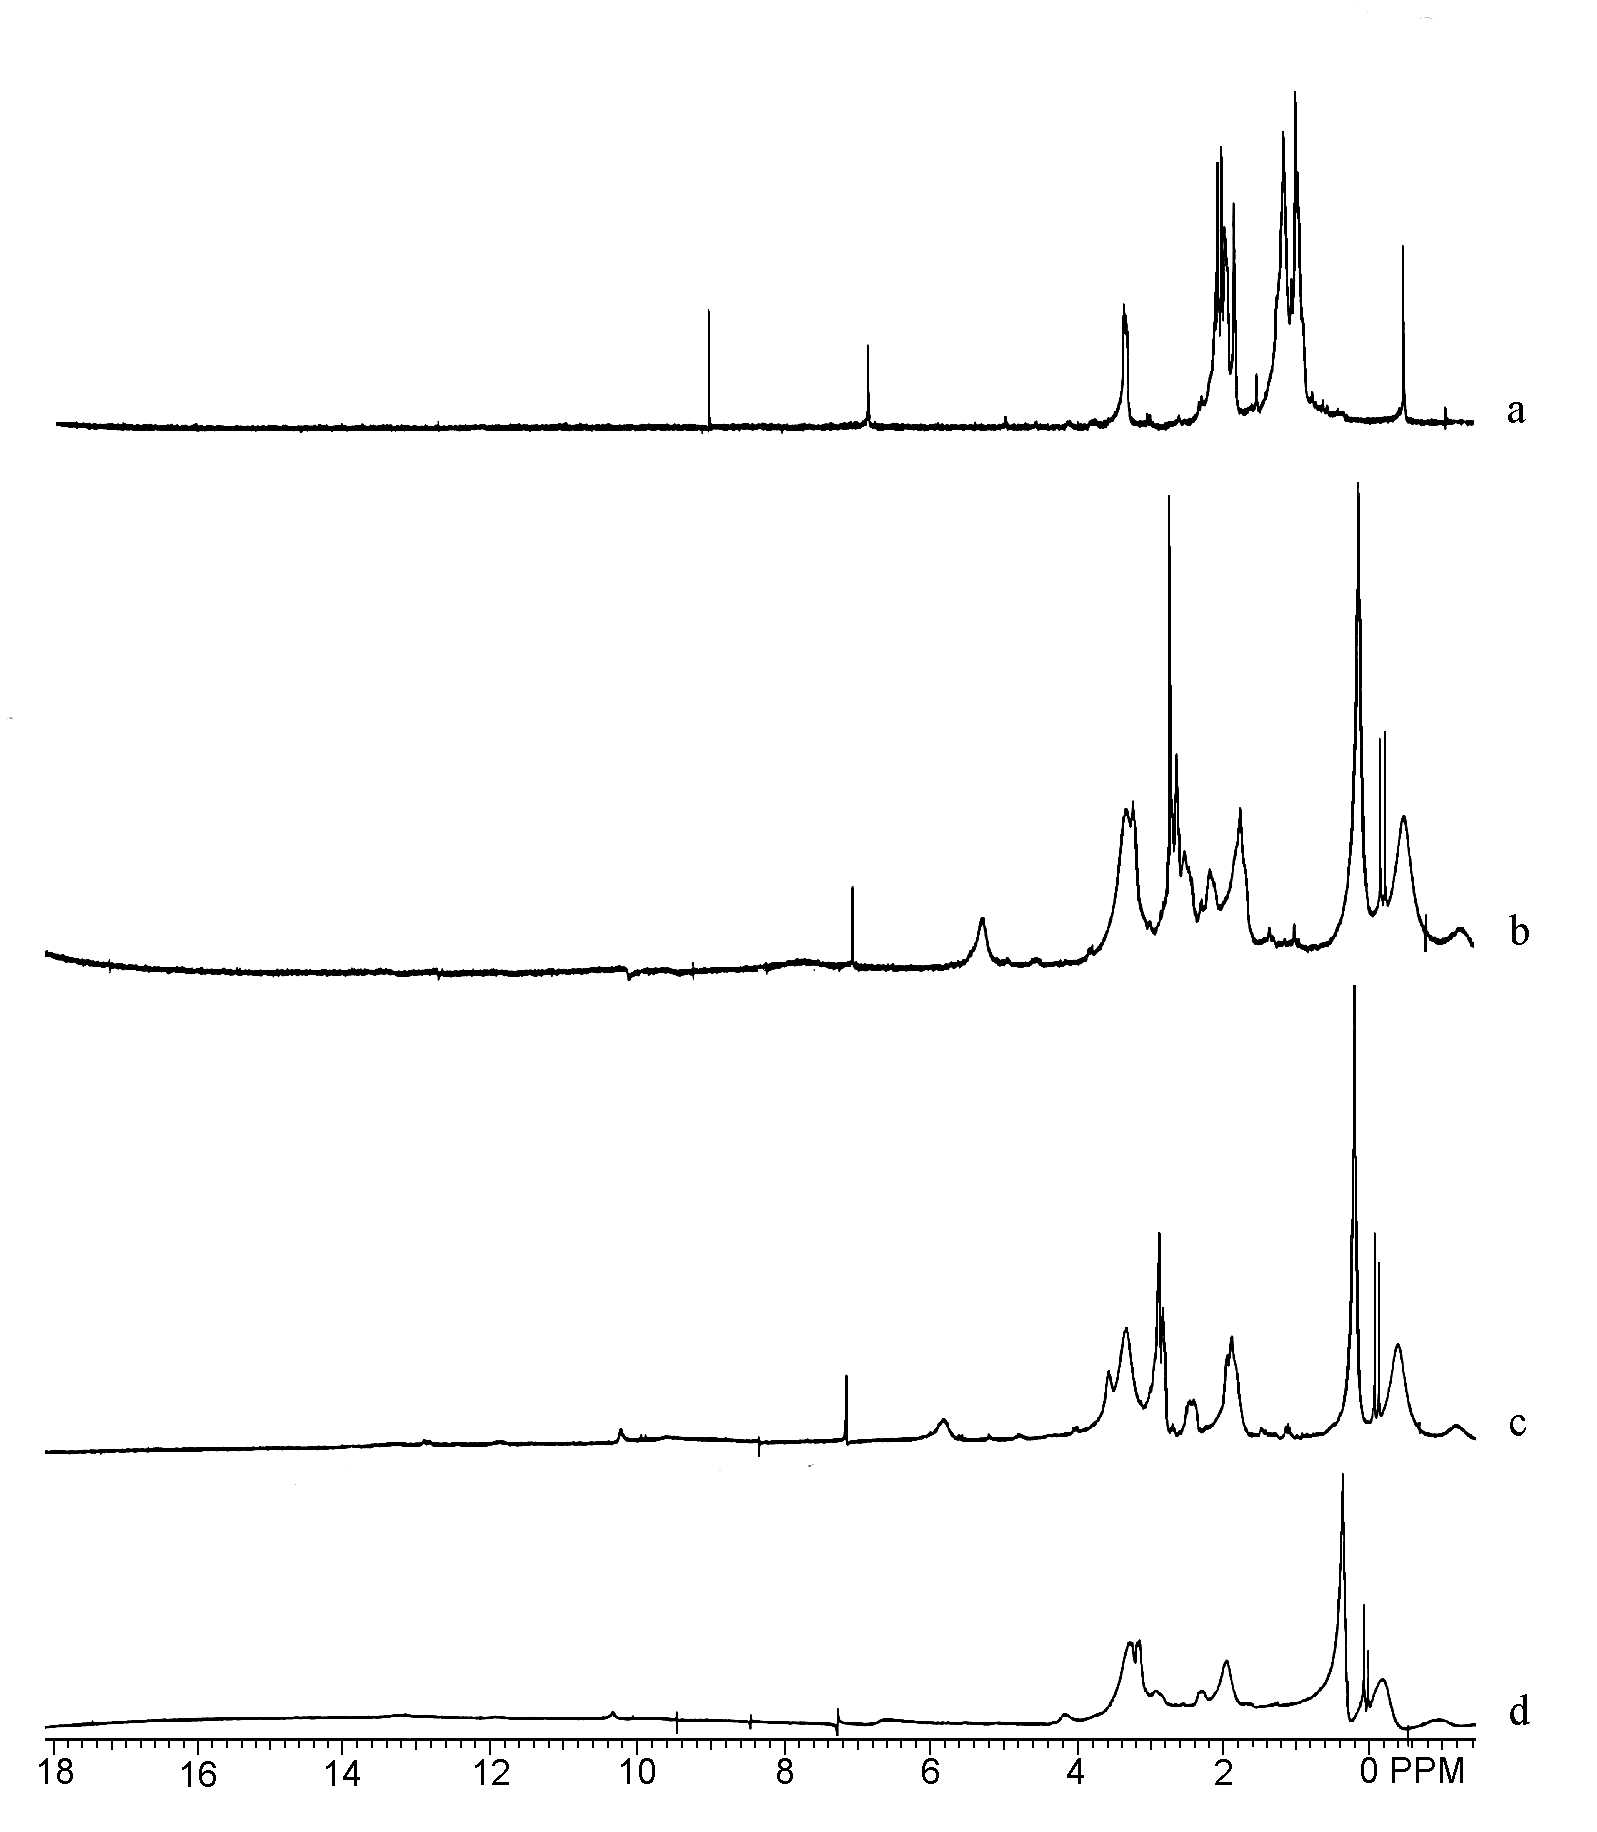


1H (200 MHz) spectra of alcohol **3** in presence of Eu(tfc)3. The portion of C-CSR is ca. (a) 0; (b) 15; (c) 20 and (d) 30 mg to 10 mg of substrate.


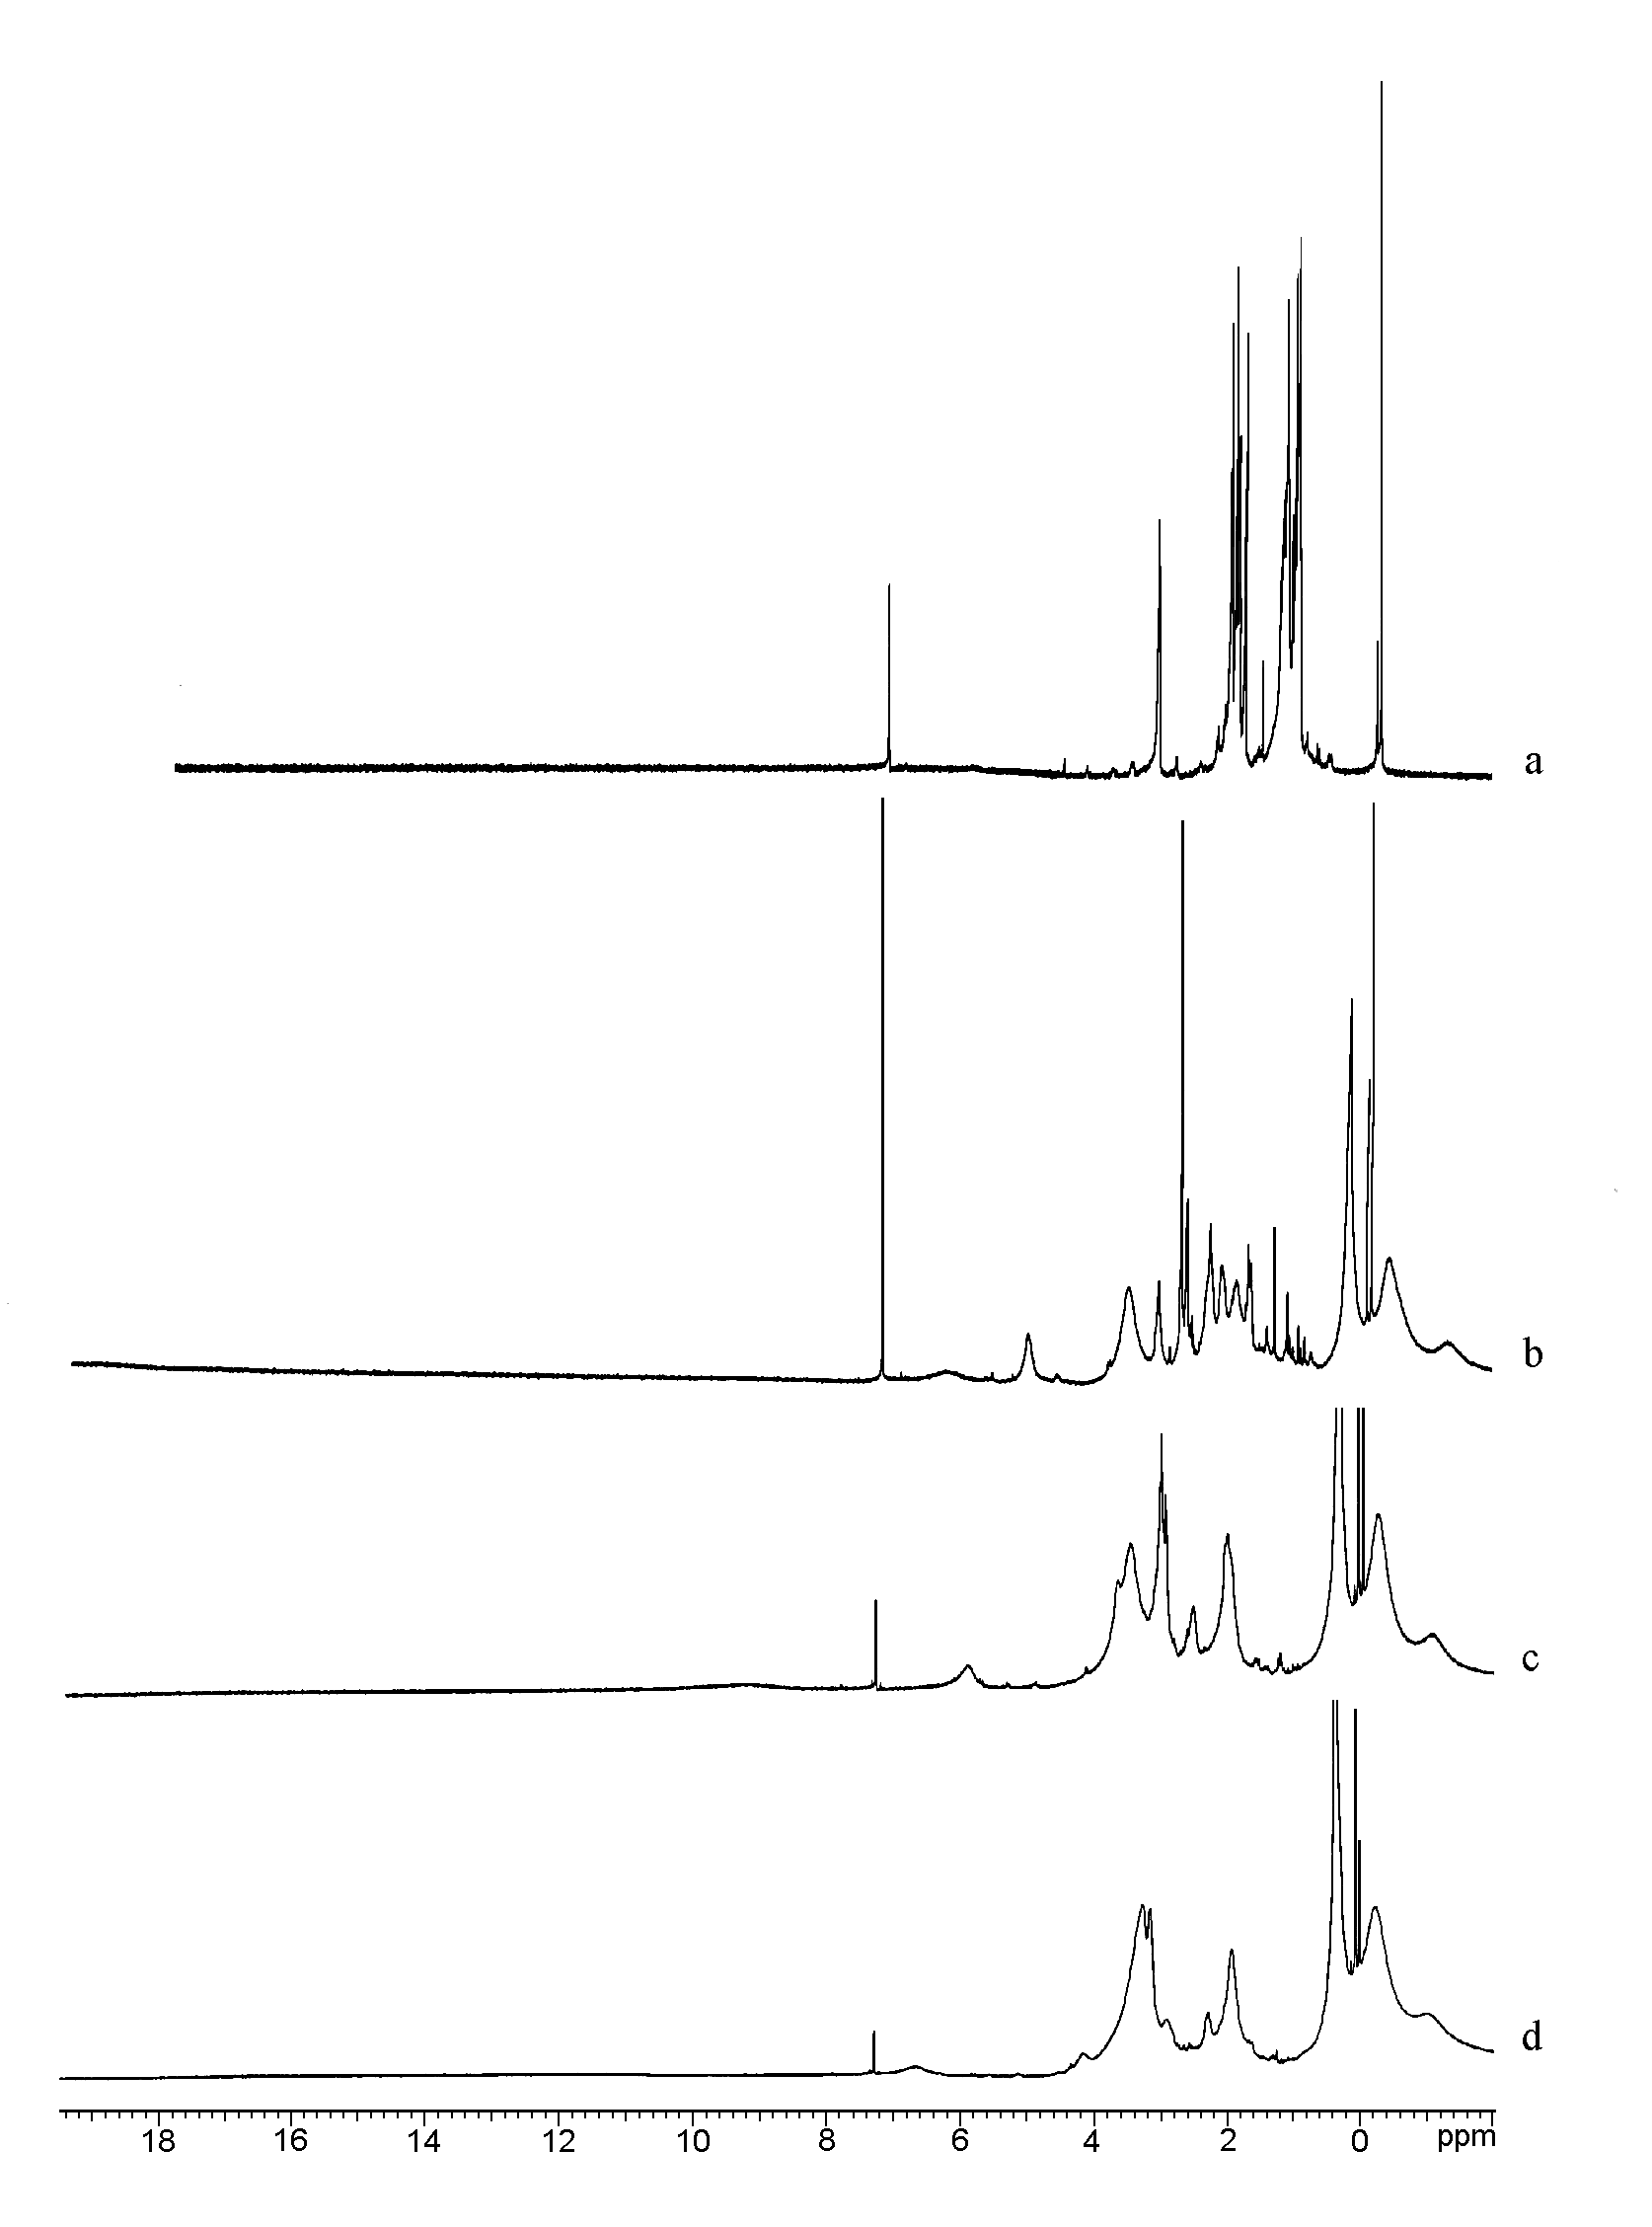


1H (300 MHz) spectra of alcohol **3** in presence of Eu(tfc)3. The portion of C-CSR is ca. (a) 0; (b) 15; (c) 20 and (d) 30 mg to 10 mg of substrate.


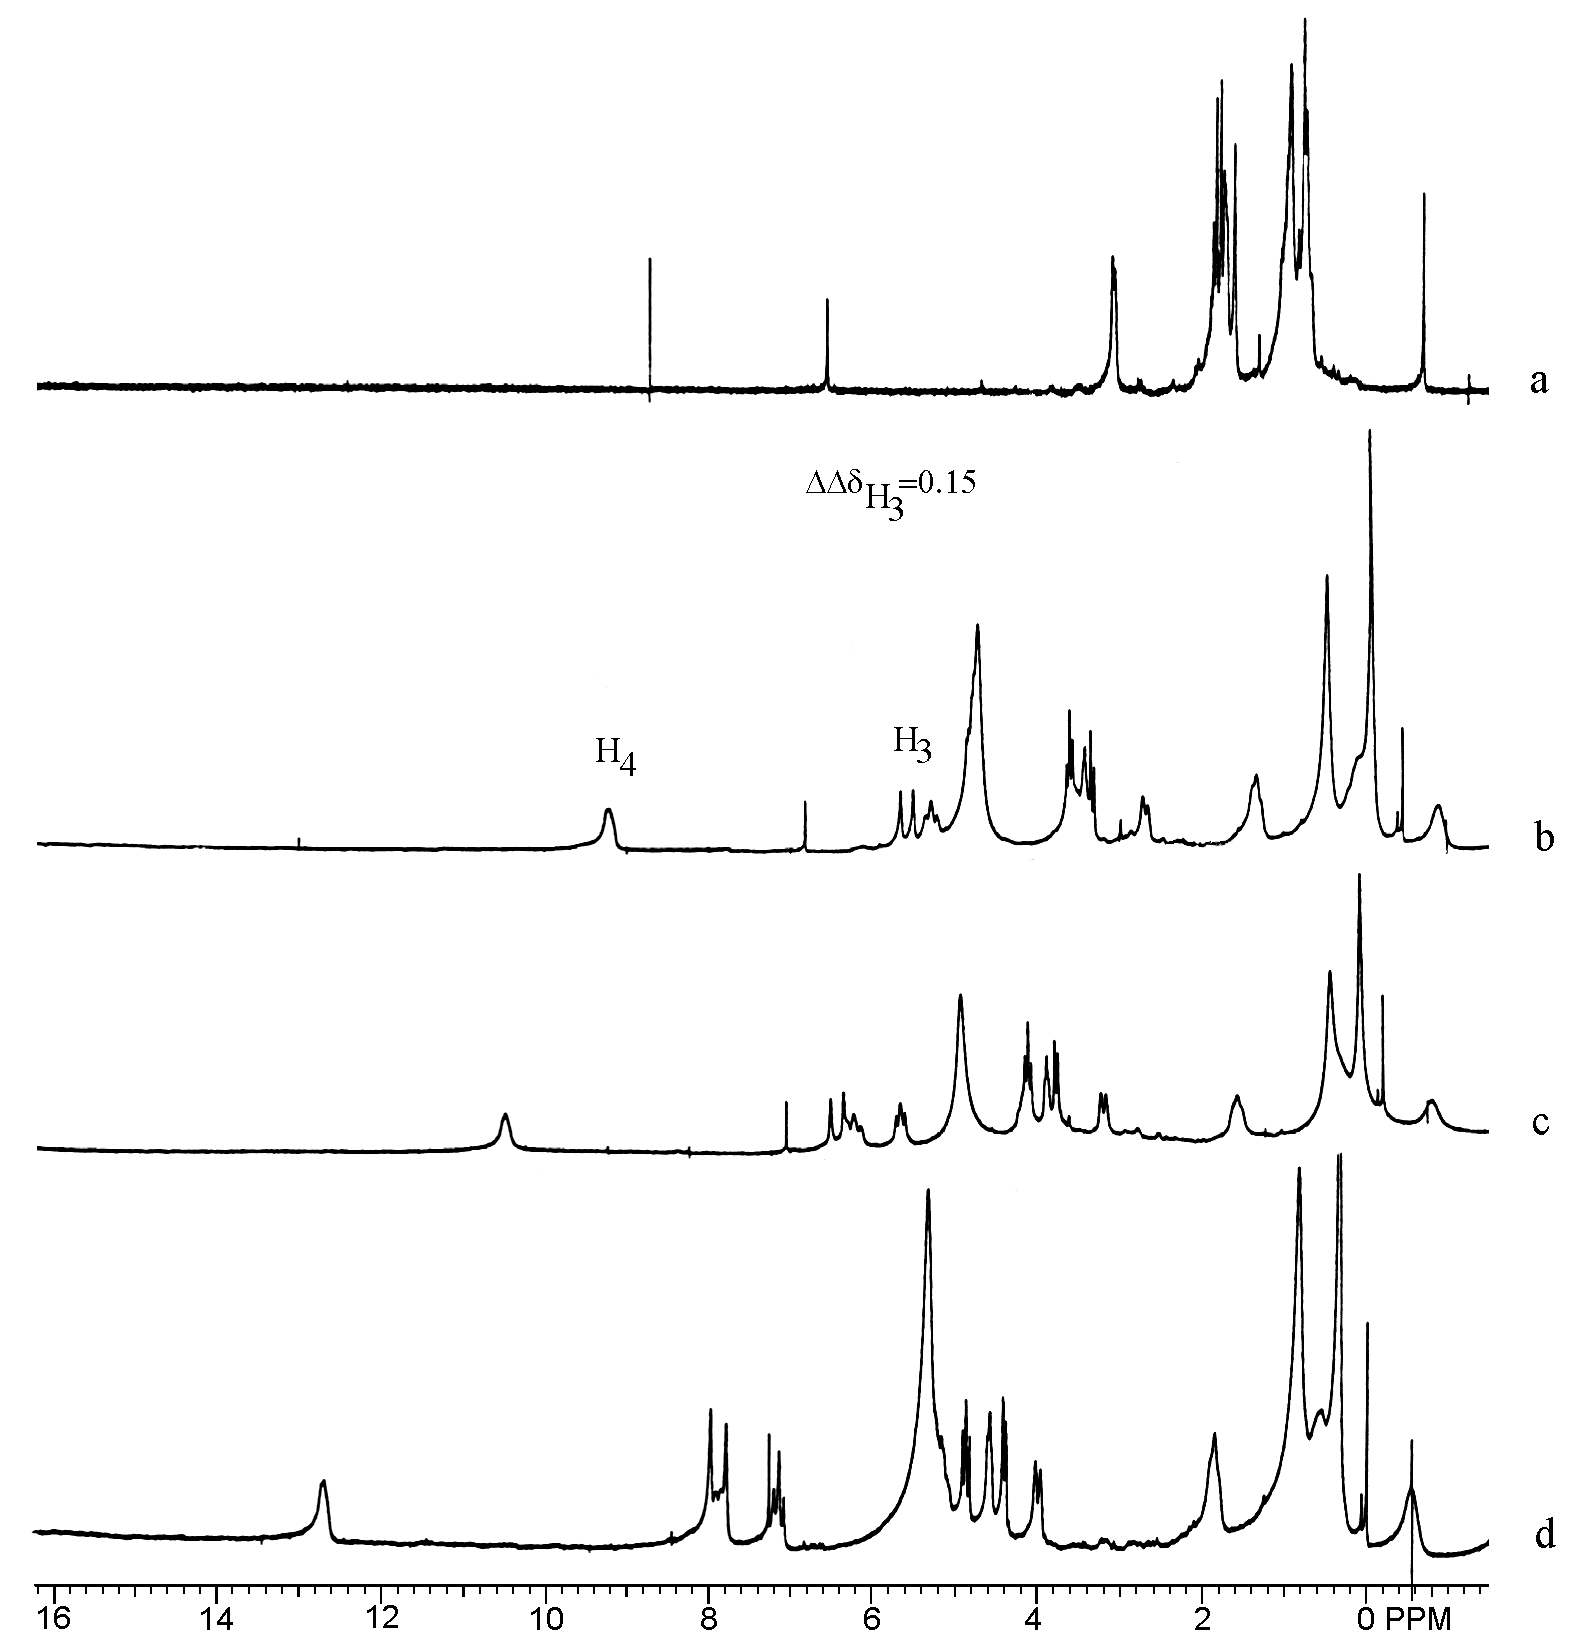


1H (200 MHz) spectra of alcohol **3** in presence of Eu(hfc)3. The portion of C-CSR is ca. (a) 0; (b) 10; (c) 15 and (d) 20 mg to 10 mg of substrate.


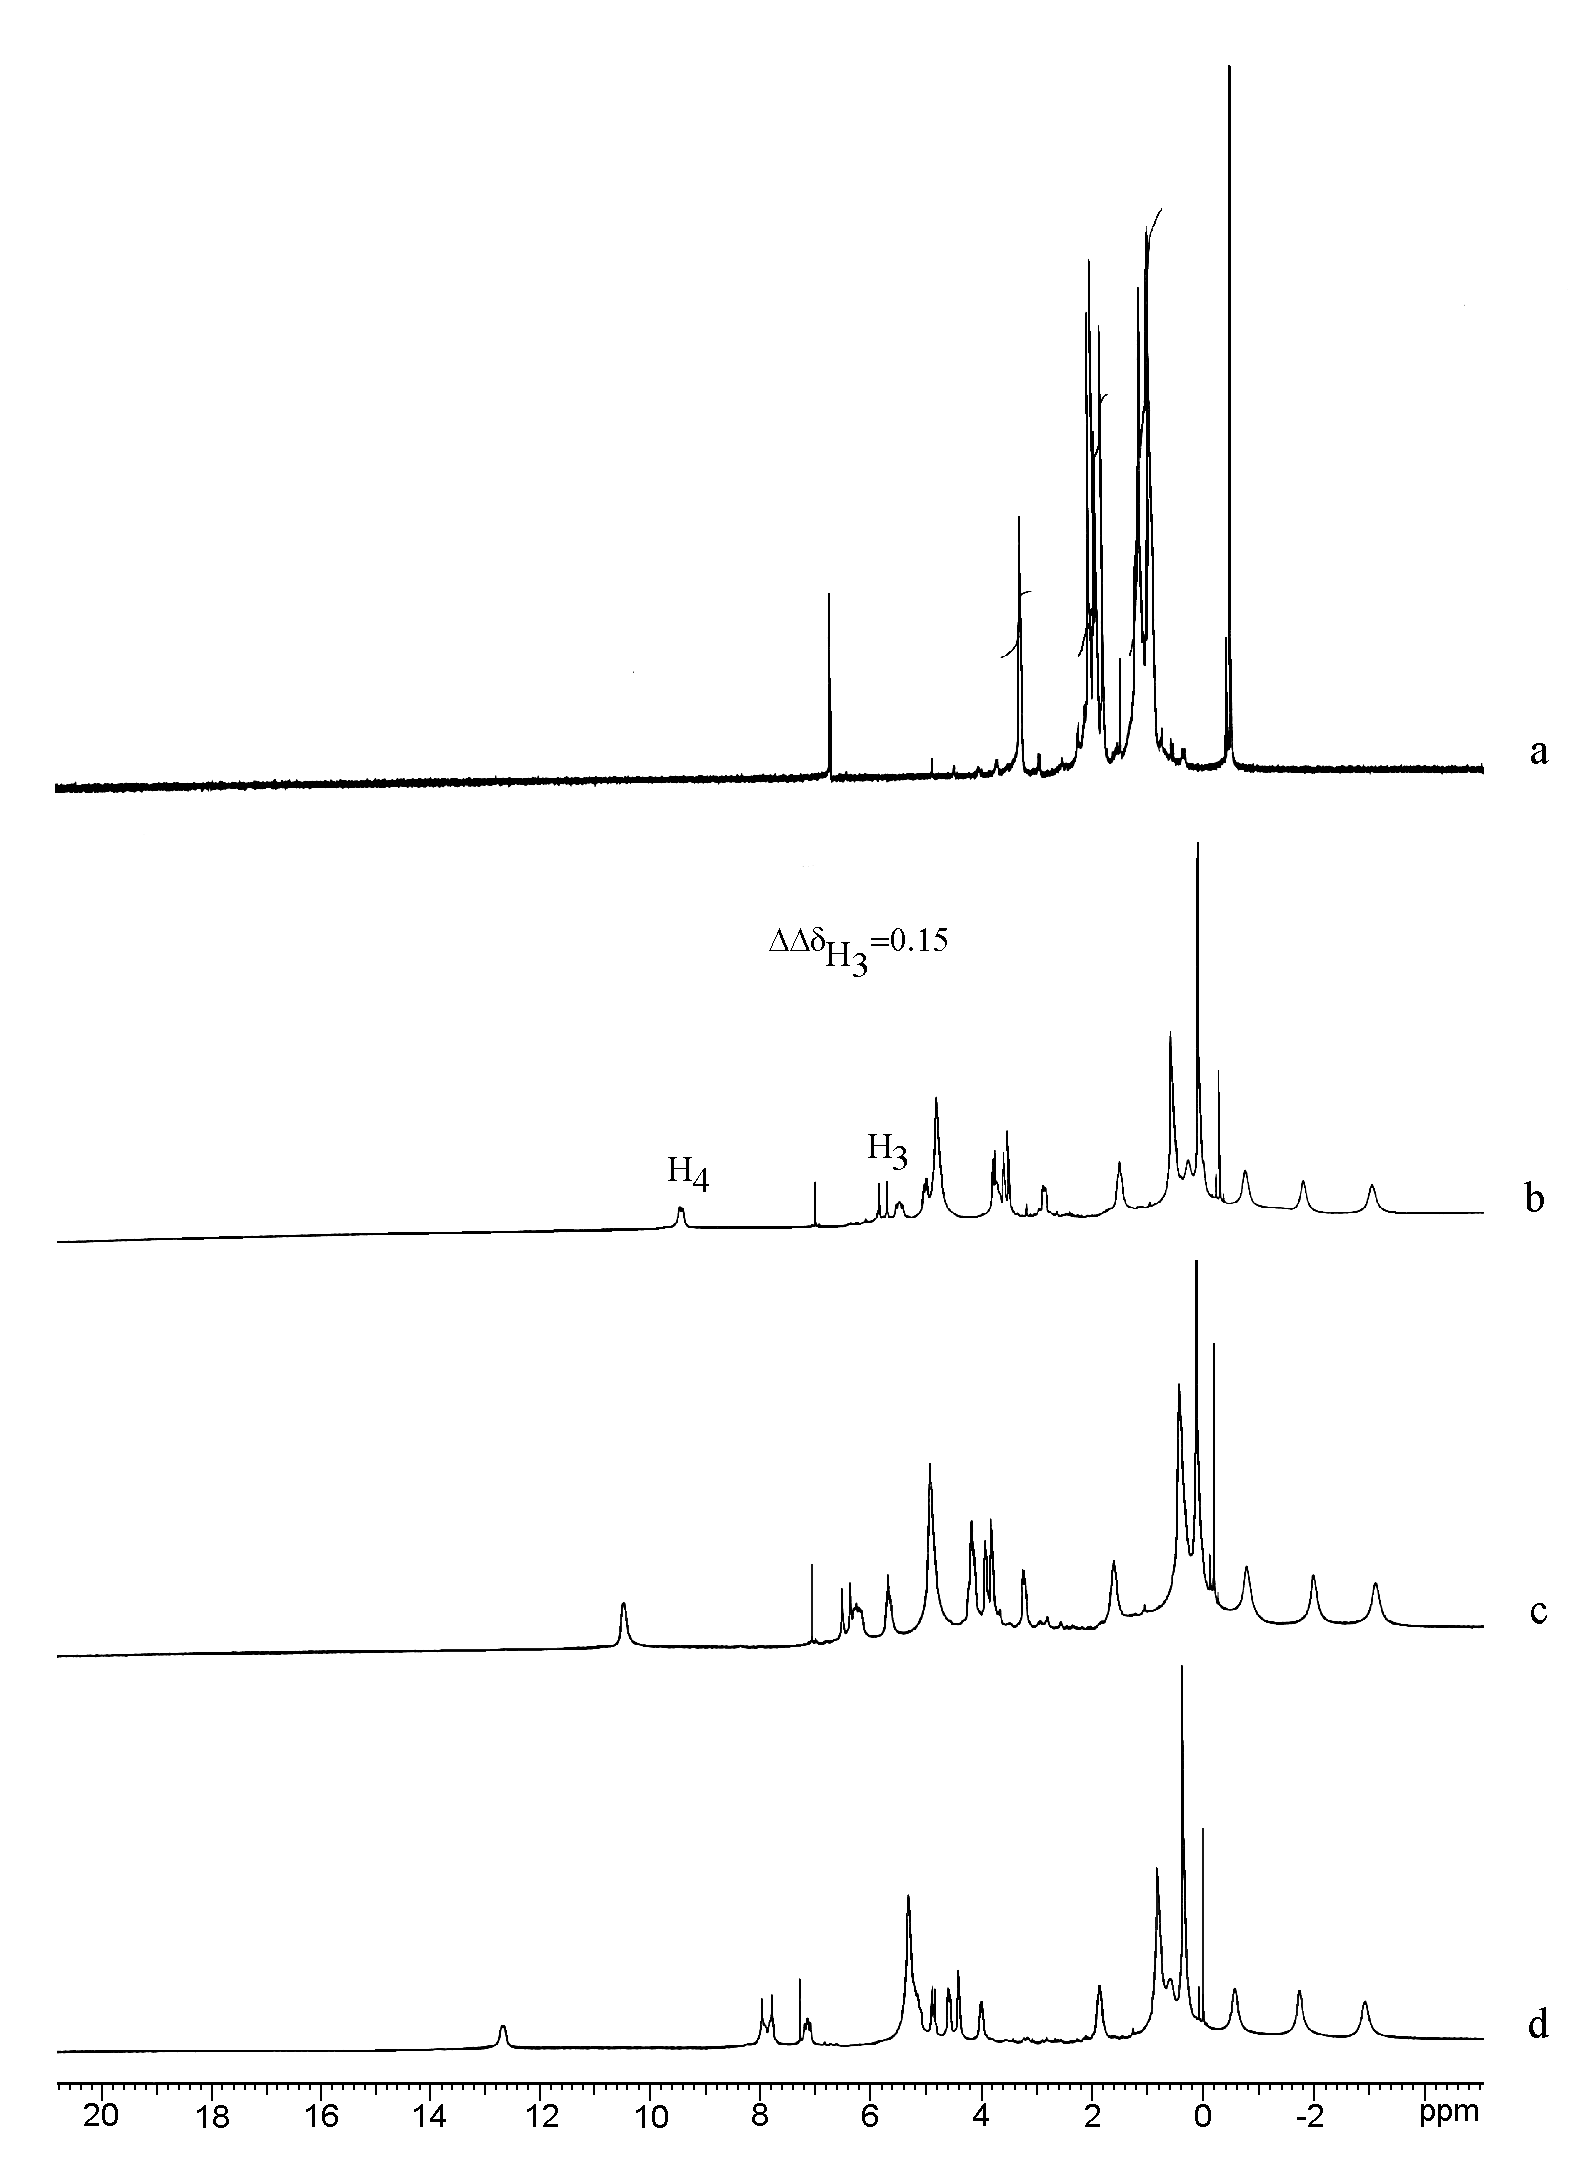


1H (300 MHz) spectra of alcohol **3** in presence of Eu(hfc)3. The portion of C-CSR is ca. (a) 0; (b) 10; (c) 15 and (d) 20 mg to 10 mg of substrate.
